# Supplementary material for: Caenorhabditis elegans SEL-5/AAK1 regulates cell migration and cell outgrowth independently of its kinase activity
Source: eLife journal article supplement (doi:10.7554/elife.91054), 2024-07-19
Supplement: supp [file elife-91054-supp-v1.zip]

|       |     |                                                                             |                           |        |        |         |             |          |       |     |
|-------|-----|-----------------------------------------------------------------------------|---------------------------|--------|--------|---------|-------------|----------|-------|-----|
| hAAK1 | 46  | VTVDDEVLAEGGFAIVFLVRTSNGMKCAL                                               | KRMFV-NNEHDLQVCKREIQIMRDL | SGHKNI | VG     | IDSSINN | VSSGDV      | WEVLI    | 124   |     |
| SEL-5 | 47  | VTIEKQIAEGGFAIVYVASDRKNNKFAL                                                | KRQFTKDNEKQLEACCREHSFLKQC | IGHKN  | IVEFV  | DSYTN   | CLGNG-      | IWECML   | 125   |     |
|       |     | **::: :*****::: .. * **** *. :***:::.* ** :::: ***** ::* * :..* :** ::      |                           |        |        |         |             |          |       |     |
| hAAK1 | 125 | LMDFCRGGQVVNLMNQRLQT--GFTENE                                                | VLQIFCDTCEAVARLHQCKTPII   | HRDL   | KVEN   | ILL--   | HDRGH       | YVLCDFGS | ATN   | 200 |
| SEL-5 | 126 | LTEYHQ-KNVLQLMNERISQNQYL                                                    | TNDEILSIFTDLCEAVSFIHNR    | PQPII  | HRDL   | KVEN    | VLISSHKPPHY | VLCDFGS  | ATT   | 204 |
|       |     | * :: : :*****::: :*****: :*: *****:*****:*. *****.                          |                           |        |        |         |             |          |       |     |
| hAAK1 | 201 | KFQNPQTEGVNAVEDEIKKYTTLSY                                                   | RAPEMVNLYSGKIITTKADI      | WALGCL | LYKLCY | FTLP    | FGESQVA     | ICDGNFT  | IPDNS | 280 |
| SEL-5 | 205 | QILSVEKYGVEYVKSEVERNTTMCY                                                   | RSPERMIDFYSGLEIGLKSDI     | WALGV  | LLYRLC | FFCVP   | FEESPLA     | IQSVNYQ  | FPSVP | 284 |
|       |     | :: . . ** : *:.*::: **:.**:*:::*** * *:***** ***:**:* :** ** :** . *: :*. . |                           |        |        |         |             |          |       |     |
| hAAK1 | 281 | RYSQDMHCLIRYMLEPDPDKRPDI                                                    | YQVSYFSFKLL               | 315    |        |         |             |          |       |     |
| SEL-5 | 285 | NIPDEIKVLIYMLLDIDVNR                                                        | RPSIYQTSVLA               | FE--   | 317    |         |             |          |       |     |
|       |     | . :::: ** :*: * ::**.***.* :*:                                              |                           |        |        |         |             |          |       |     |
