# Supplementary material for: Caenorhabditis elegans SEL-5/AAK1 regulates cell migration and cell outgrowth independently of its kinase activity
Source: eLife. 2024 Jul 19;13:e91054. doi: 10.7554/eLife.91054 (PMC11333045; doi:10.7554/eLife.91054)
Supplement: Supplementary file 1. [file elife-91054-supp1.xlsx]

## Sheet: Strains
Supplementary Table 1. List of all generated C. elegans strains
Strain designation	Strain genotype
CUP100	sel-5(ok363) vps-29(tm1320)III; muIs32[Pmec-7::gfp]II; mamEx22[Pegl-20::gfp::sel-5; Pmyo-2::tdTomato]
CUP101	sel-5(ok363) vps-29(tm1320)III; muIs32[Pmec-7::gfp]II; mamEx24[Phlh-1::gfp::sel-5; Pmyo-2::tdTomato]
CUP105	sel-5(ok363) vps-29(tm1320)III; mamEx11[Ppgp-12::gfp; Pmyo-2::tdTomato]; mamEx25[Ppgp-12::gfp::sel-5; Pmyo-2::tdTomato]
CUP106	sel-5(ok363) vps-29(tm1320)III; mamEx11[Ppgp-12::gfp; Pmyo-2::tdTomato]; mamEx26[Ppgp-12::gfp::sel-5D178A; Pmyo-2::tdTomato]
CUP107	sel-5(ok363) vps-29(tm1320)III; mamEx11[Ppgp-12::gfp; Pmyo-2::tdTomato]; mamEx27[Phlh-1::gfp::sel-5; Pmyo-2::tdTomato]
CUP108	sel-5(ok149) vps-29(tm1320)III; mamEx11[Ppgp-12::gfp; Pmyo-2::tdTomato]
CUP110	sel-5(ok149)III; muIs32[Pmec-7::gfp]II
CUP111	sel-5(mam1[gfp^SEC^sel-5])
CUP112	sel-5(mam2[gfp::sel-5])
CUP113	mamEx29[Ppgp-12::gfp]
CUP114	sel-5(ok363)III; mamEx29[Ppgp-12::gfp]
CUP119	sel-5(ok149) vps-29(tm1320)III; muIs32[Pmec-7::gfp]II
CUP122	sel-5(ok149) vps-29(tm1320)III; muIs32[Pmec-7::gfp]II; mamEx17[Pegl-20::gfp::sel-5D178A; Pmyo-2::tdTomato]
CUP126	cfz-2(ok1201)V; sIs10089[Ppgp-12::gfp]III
CUP127	cwn-1(ok546)II; sIs10089[Ppgp-12::gfp]III
CUP128	cwn-2(ok895)IV; sIs10089[Ppgp-12::gfp]III
CUP131	mig-1(e1787)I; cfz-2(ok1201)V; sIs10089[Ppgp-12::gfp]III
CUP133	lin-17(n671)I; cfz-2(ok1201)V; sIs10089[Ppgp-12::gfp]III
CUP134	mig-1(e1787)I; sel-5(ok363)III; muIs32[Pmec-7::gfp] II
CUP142	mamEx38[Peft-3::dpy-23::gfp; myo-2p::tdTomato]
CUP143	mamEx39[Peft-3::dpy-23::gfp(T160A); myo-2p::tdTomato]
CUP144	sel-5(ok149)III; mamEx38 [eft-3p::dpy-23::gfp; myo-2p::tdTomato]
CUP145	vps-29(tm1320)III; mamEx29[Ppgp-12::gfp]
CUP146	sel-5(ok363) vps-29(tm1320)III; mamEx29[Ppgp-12::gfp]
CUP147	mig-5(cp385[mNG-GLO^AID::mig-5])II; mamEx29[Ppgp-12::gfp]; mamEx34[eft-3p::TIR::mRuby; myo2p::tdTomato]
CUP149	sel-5(ok363) vps-29(tm1320)III; mamEx11[Ppgp-12::gfp; Pmyo-2::tdTomato]; mamEx41[Pcol-10::gfp::sel-5; Pmyo-2::tdTomato]
CUP152	pry-1(mu38)I; sIs10089[Ppgp-12::gfp]III
CUP153	lin-44(n1792)I; sel-5(ok149); mamEx11[Ppgp-12::gfp; Pmyo-2::tdTomato]
CUP156	lin-44(n1792)I; cwn-2(ok895)IV; sIs10089[Ppgp-12::gfp]III
CUP157	lin-44(n1792)I; egl-20(n585)IV; sIs10089[Ppgp-12::gfp]III
CUP160	sel-5(ok363)III; dpy-23(mew25)X; muIs32[Pmec-7::gfp]II
CUP161	vps-29(tm1320)III; dpy-23(mew25)X; muIs32[Pmec-7::gfp]II
CUP162	dpy-23(mew25)X; muIs32[Pmec-7::gfp]II
CUP163	sel-5(ok149)III; mamEx11[Ppgp-12::gfp; Pmyo-2::tdTomato]
CUP165	cwn-1(ok546)II; cwn-2(ok895)IV; sIs10089[Ppgp-12::gfp]III
CUP193	lin-17(n671)I; sel-5(ok363)III; muIs32[Pmec-7::gfp]II
CUP194	lin-17(n671)I; sel-5(ok149)III; muIs32[Pmec-7::gfp]II
CUP195	mig-1(e1787)I; muIs32[Pmec-7::gfp]II
CUP196	mig-1(e1787)I; sel-5(ok149)III; muIs32[Pmec-7::gfp]II
CUP198	sel-5(ok149)III; huSi2[Pmig-14::mig-14::gfp]II
CUP199	sel-5(ok363) vps-29(tm1320)III; mamEx11[Ppgp-12::gfp; Pmyo-2::tdTomato]; mamEx42[Ppgp-12::vps-29::gfp; Pmyo-2::tdTomato]
CUP200	dpy-23(mew25)X; mamEx11[Ppgp-12::gfp; Pmyo-2::tdTomato]
CUP201	sel-5(ok149)III; dpy-23(mew25)X; mamEx11[Ppgp-12::gfp; Pmyo-2::tdTomato]
CUP202	vps-29(tm1320)III; dpy-23(mew25)X; mamEx11[Ppgp-12::gfp; Pmyo-2::tdTomato]
CUP203	mig-1(e1787)I; egl-20(n585)IV; sIs10089[Ppgp-12::gfp]III
CUP204	lin-17(n671)I; sel-5(ok149); mamEx11[Ppgp-12::gfp; Pmyo-2::tdTomato]
CUP205	lin-17(n671) mig-1(e1787)I; sIs10089[Ppgp-12::gfp]III
CUP206	lin-17(n671)I; egl-20(n585)IV; sIs10089[Ppgp-12::gfp]III
CUP218	egl-20(mam3[egl-20::gfp])
CUP219	sel-5(ok149); egl-20(mam3[egl-20::gfp])
CUP220	vps-29(tm1320); egl-20(mam3[egl-20::gfp])
CUP221	sel-5(ok149) vps-29(tm1320);egl-20(mam3[egl-20::gfp])
CUP222	vps-35(hu68); egl-20(mam3[egl-20::gfp])
CUP22	sel-5(ok363)III; muIs32[Pmec-7::gfp]II
CUP24	sel-5(ok363) vps-29(tm1320)III; muIs32[Pmec-7::gfp]II
CUP26	sel-5(ok363)III; huSi2[Pmig-14::mig-14::gfp]II
CUP28	sel-5(ok363) vps-29(tm1320)III; huSi2[Pmig-14::mig-14::gfp]II
CUP34	vps-29(tm1320)III; huSi2[Pmig-14::mig-14::gfp]II
CUP59	lin-17(n671)I; sIs10089[Ppgp-12::gfp]III
CUP60	lin-44(n1792)I; sIs10089[Ppgp-12::gfp]III
CUP61	sel-5(ok363)III; mamEx11[Ppgp-12::gfp; Pmyo-2::tdTomato]
CUP62	sel-5(ok363) vps-29(tm1320)III; mamEx11[Ppgp-12::gfp; Pmyo-2::tdTomato]
CUP63	vps-29(tm1320)III; mamEx11[Ppgp-12::gfp; Pmyo-2::tdTomato]
CUP64	mamEx11[Ppgp-12::gfp; Pmyo-2::tdTomato]
CUP78	lin-17(n671)I; muIs32[Pmec-7::gfp]II
CUP79	lin-44(n1792)I; cwn-1(ok546)II; sIs10089[Ppgp-12::gfp]III
CUP82	egl-20(n585)IV; sIs10089[Ppgp-12::gfp]III
CUP83	mig-14(mu71)II; sIs10089[Ppgp-12::gfp]III
CUP85	cwn-1(ok546)II; egl-20(n585)IV; sIs10089[Ppgp-12::gfp]III
CUP86	mig-1(e1787)I; sIs10089[Ppgp-12::gfp]III
CUP87	dsh-1(ok1445)II; sIs10089[Ppgp-12::gfp]III
CUP92	sel-5(ok363) vps-29(tm1320)III; muIs32[Pmec-7::gfp]II; mamEx23[Pegl-20::gfp::sel-5K75A; Pmyo-2::tdTomato]
CUP95	sel-5(ok363) vps-29(tm1320)III; muIs32[Pmec-7::gfp]II; mamEx17[Pegl-20::gfp::sel-5D178A; Pmyo-2::tdTomato]
CUP96	sel-5(ok363) vps-29(tm1320)III; muIs32[Pmec-7::gfp]II; mamEx18[Pwrt-2::gfp::sel-5; Pmyo-2::tdTomato]
