# Supplementary material for: Caenorhabditis elegans SEL-5/AAK1 regulates cell migration and cell outgrowth independently of its kinase activity
Source: eLife. 2024 Jul 19;13:e91054. doi: 10.7554/eLife.91054 (PMC11333045; doi:10.7554/eLife.91054)
Supplement: Supplementary file 2. [file elife-91054-supp2.xlsx]

## Sheet: Primers
Supplementary Table 2. List of all primers used to construct plasmid vectors
Primer designation	Primer sequence 5' - 3'
dpy23-eft3p-R	CCTTTGTGATTGTAAACGAACAATCCACCAATCATTGTTTCCCAACTGAAAAAAAAAC
dpy23ex1-F	ATGATTGGTGGATTGTTCGTTTAC
dpy23-GFP-R	ACAACTCCAGTGAAAAGTTCTTCTCCTTTACTCATGCATCTGGTTTCATACAGTCC
dpy23T160A-F	AAATCACGTCTCAAGTGGCTGGCCAAATTGGATGG
dpy23T160A-R	CCATCCAATTTGGCCAGCCACTTGAGACGTGATTT
egl20-c3arm-F	CGTGATTACAAGGATGACGATGACAAGAGAggtaagaaataactttttaaaacgggac
egl20-c3arm-R	ggaaacagctatgaccatgttatcgatttcagggaacacaagagcaaagcc
egl20-c5arm-F	acgttgtaaaacgacggccagtcgccggcaCATACGTACATCGATCACCGTC
egl20-c5arm-R	CATCGATGCTCCTGAGGCTCCCGATGCTCCTTTGCATGTATGTACTGCAACTTC
egl20Cterm-sg-F	GCAGTACATACATGCAAATAGTTTTAGAGCTAGAAATAGCAAGT
egl20p-GFP-R	ACAACTCCAGTGAAAAGTTCTTCTCCTTTACTCATtatttctgaaattgagatgttttag
GFPcel-F	ATGAGTAAAGGAGAAGAACTTTTC
GFP-col10p-R	ACAACTCCAGTGAAAAGTTCTTCTCCTTTACTCATGACTGAAAGCCAGGTACCTT
GFPsel5-F	CTGGGATTACACATGGCATGGATGAACTATACAAAATGCCTCTAGGGCTTTTCAGC
hlh1p-GFP-R	CAACTCCAGTGAAAAGTTCTTCTCCTTTACTCATttctggaaaattattggaaaatttgg
hlh1p-GFP-R	CAACTCCAGTGAAAAGTTCTTCTCCTTTACTCATttctggaaaattattggaaaatttgg
hlh1p-pPD-F	TGGATACGCTAACAACTTGGAAATGAAATAAGCTTttcacagtttggcagtggac
hlh1p-pPD-F	TGGATACGCTAACAACTTGGAAATGAAATAAGCTTttcacagtttggcagtggac
mCherry-egl20p-F	actgaaattctaaaacatctcaatttcagaaataatggtctcaaagggtgaagaag
mCherry-PH-R	tgaaggtccgggtcatcctggagcccgtgactagtcttatacaattcatccatgccacc
pgp12p-GFP-R	ACAACTCCAGTGAAAAGTTCTTCTCCTTTACTCATgtttaacctatttcagaagaatatc
pgp12p-pPD-F	TGGATACGCTAACAACTTGGAAATGAAATAAGCTTgtgtattagaatcactgaagaatg
PH-plc1d-F	actagtcacgggctccaggatgacc
PH-unc54-3UTR-R	atggcgatctgatgacagcggccgatgcggagctcttacttctgccgctggtcc
pPD95-col10p-F	TGGATACGCTAACAACTTGGAAATGAAATAAGCTTTACGTCTTCCTCTGTATTGA
pPD95eft3p-F	TGGATACGCTAACAACTTGGAAATGAAATAAGCTTGCACCTTTGGTCTTTTATTGTC
pPD95egl20p-Flong	TGGATACGCTAACAACTTGGAAATGAAATAAGCTTcgatgaatacggtagaaccaag
pPD95-R	AAGCTTATTTCATTTCCAAGTTGTT
sel5-3arm-F	CGTGATTACAAGGATGACGATGACAAGAGAATGCCTCTAGGGCTTTTCAG
sel5-3arm-R	TCACACAGGAAACAGCTATGACCATGTTATTGTCAACAGCATGCATTCCC
sel5-5arm-F	ACGTTGTAAAACGACGGCCAGTCGCCGGCAATCAAACCTTGTGGTGTGGC
sel5-5armGFP-R	TCCAGTGAACAATTCTTCTCCTTTACTCATGGCTTTTCGCCTGAAATTAG
sel5D178A-F	ccacaacctatcattcatcgcgctttaaaagttgaaaatgtactca
sel5D178A-R	tgagtacattttcaacttttaaagcgcgatgaatgataggttgtgg
sel5ex17-R	TGGCCACAAGTCGGTTGGATCATCATG
sel5ex1-F	AGATCTATGCCTCTAGGGCTTTTCAGC
sel5ex1-sg2-F	TCTAGGGCTTTTCAGCTCGTTTTAGAGCTAGAAATAGC
sel5ex1-sg2-R	GCTGAAAAGCCCTAGAGGCAAGACATCTCGCAATAGGA
sel5K75A-F	AACAATAAATTCGCCTTGgcACGTCAATTCACCAAAGACAATGAGA
sel5K75A-R	TCTCATTGTCTTTGGTGAATTGACGTgcCAAGGCGAATTTATTGTT
unc54sel5-R	atggcgatctgatgacagcggccgatgcggagctcTTACAAGTCGGTTGGATCATCATG
vps29ex1_2-F	ATGTTGAACTTTCAGCTGGTGC
vps29-GFP-R	ACAACTCCAGTGAAAAGTTCTTCTCCTTTACTCATTGTGGTCTTCGATTTCTTGTAAATG
vps29-pgp12p-R	TCGCCGATTAGGAGCACCAGCTGAAAGTTCAACATgtttaacctatttcagaagaatatc
wrt2p-GFP-R	ACAACTCCAGTGAAAAGTTCTTCTCCTTTACTCATccgagaaacaattggcaggt
wrt2p-pPD-F	TGGATACGCTAACAACTTGGAAATGAAATAAGCTTcaggtaatttcacaacatccg
