# Supplementary figures and images for: Caenorhabditis elegans SEL-5/AAK1 regulates cell migration and cell outgrowth independently of its kinase activity
Source: eLife journal article supplement (doi:10.7554/elife.91054), 2024-07-19

*Pmig-14::mig-14::gfp*

*Pegl-20::mCherry::PH*

merge

inset

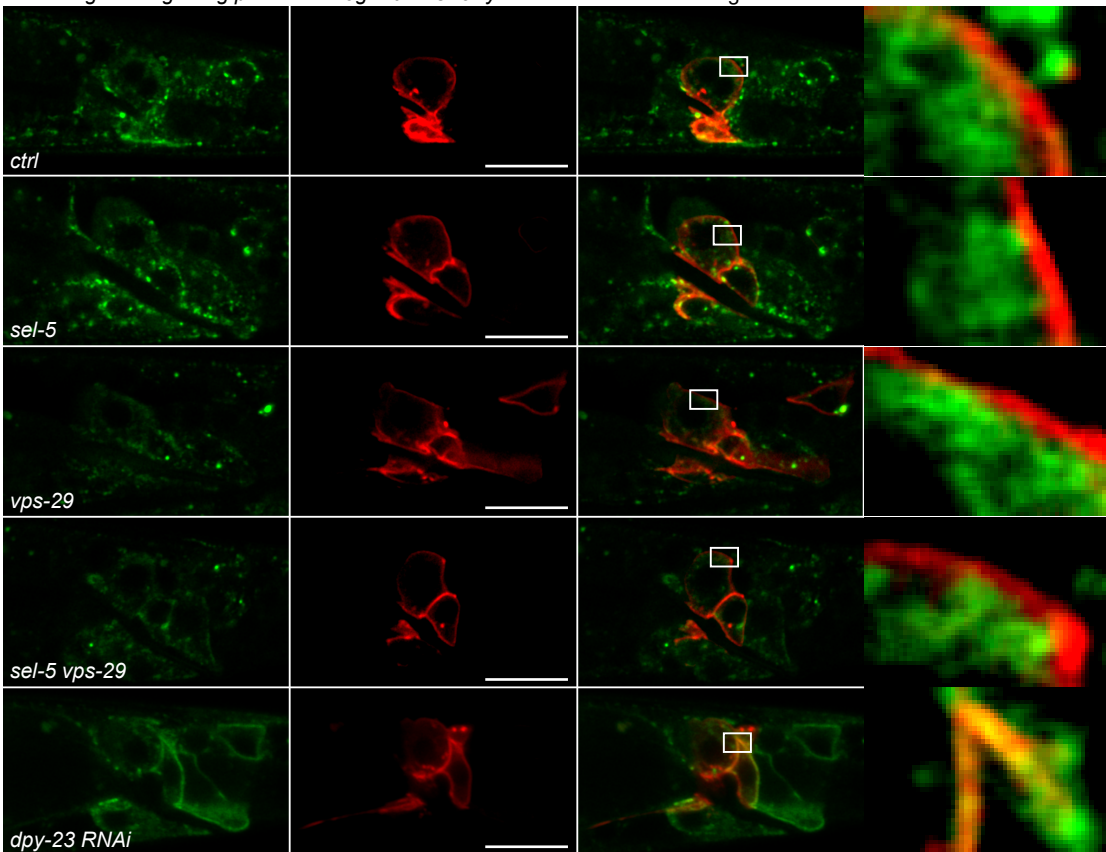

Supplement: supp [file elife-91054-supp-v1.zip]

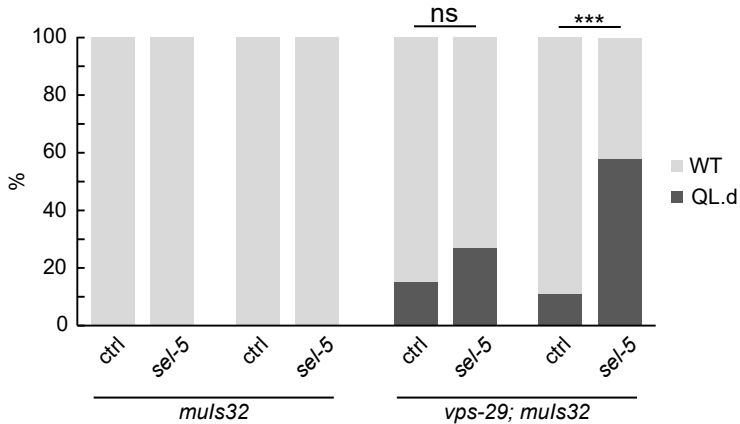

Supplement: supp [file elife-91054-supp-v1.zip]

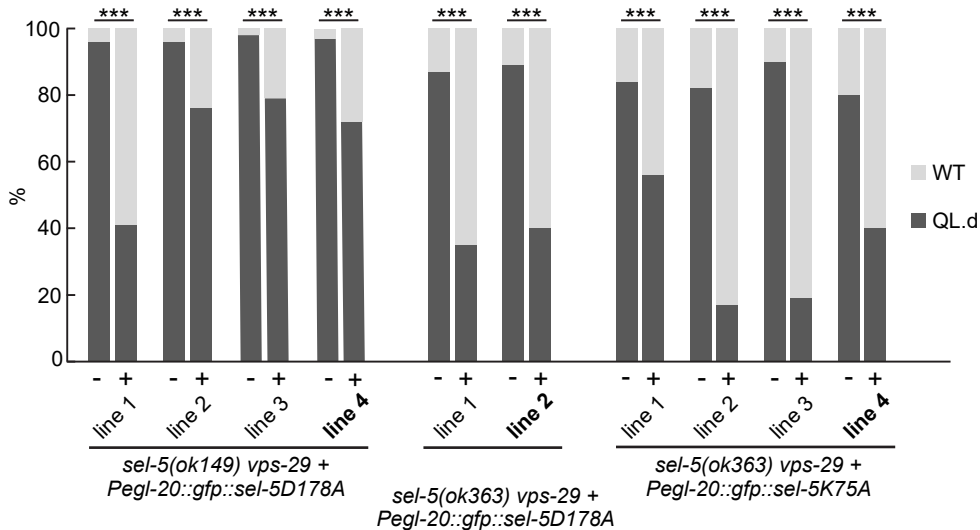

Supplement: supp [file elife-91054-supp-v1.zip]

*Caenorhabditis elegans* sel-5 locus

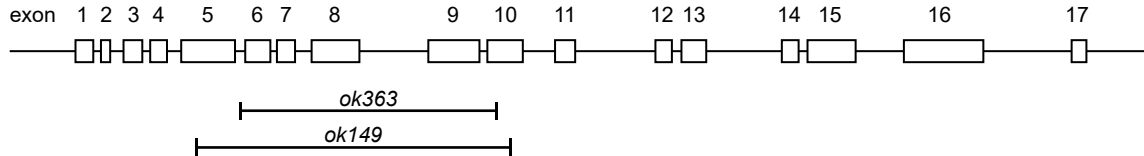

Supplement: supp [file elife-91054-supp-v1.zip]

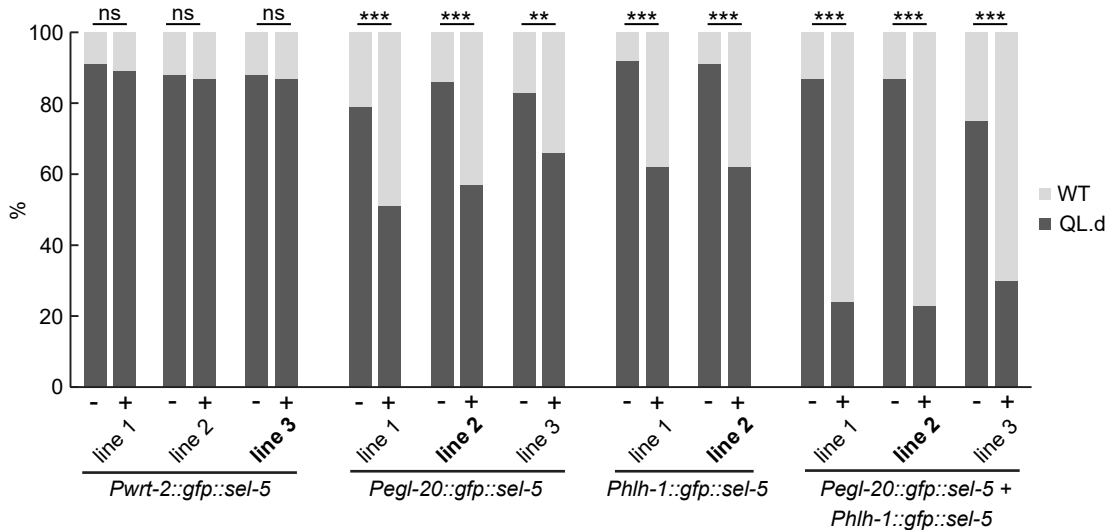

Supplement: supp [file elife-91054-supp-v1.zip]
